# Supplementary material for: A facile synthesis of a Ce-based MOF at room temperature for effective adsorption of methylene blue
Source: Royal Society of Chemistry journal article supplement (doi:10.1039/d4ce00096j), 2024-01-01
Supplement: d4ce00096j1.pdf [file d4ce00096j1.pdf]

## Electronic Supplementary Information

### **A facile synthesis of Ce-based MOF at room temperature for effective adsorption of methylene blue**

Yang Zhou,<sup>a</sup> Dan wang,<sup>a</sup> Qiuxiang Feng,<sup>a</sup> Qi Wu,<sup>a</sup> Feng Cao,<sup>a</sup> Li Jiang,<sup>a</sup> Qianli Zhang,<sup>a</sup> and Jie Liu\*<sup>a</sup>

*a. School of Chemistry and Life Sciences, Suzhou University of Science and Technology, Suzhou, Jiangsu 215009, P.R. China.*

## General procedures

The crystal structure of the target materials was characterized using the Bruker D8-Advance X-ray diffractometer, under the test conditions of an operating voltage of 40 kV, an operating current of 40 mA, a scanning angle range of 5-40°, and a step size of 0.15°/s. The micro-morphological structure was analyzed with a scanning electron microscope (SEM, S4800) from Japan. The specific surface area and pore size distribution were determined using an ASAP 2020M instrument from Mack Instruments, USA. The thermal stability was assessed using a Pyris 1 TGA thermogravimetric analyzer from Perkin-Elmer, USA. The characteristic functional groups and molecular structures were identified using a Spectrum Two Fourier Infrared Spectrometer from PE, USA, with a test range of 400-4000  $\text{cm}^{-1}$ . Thermo Scientific K-Alpha X-ray photoelectron spectrometer from Thermo Fisher Scientific, UK, was utilized to characterize the target materials, and the zeta potential of the samples was measured using a Zeta-sizer Nano-ZS (Malvern, UK). The solution's concentration was determined using a HB-7 UV spectrophotometer from Beijing Haotianhui Instrument Co. Ltd.

## Additional figures

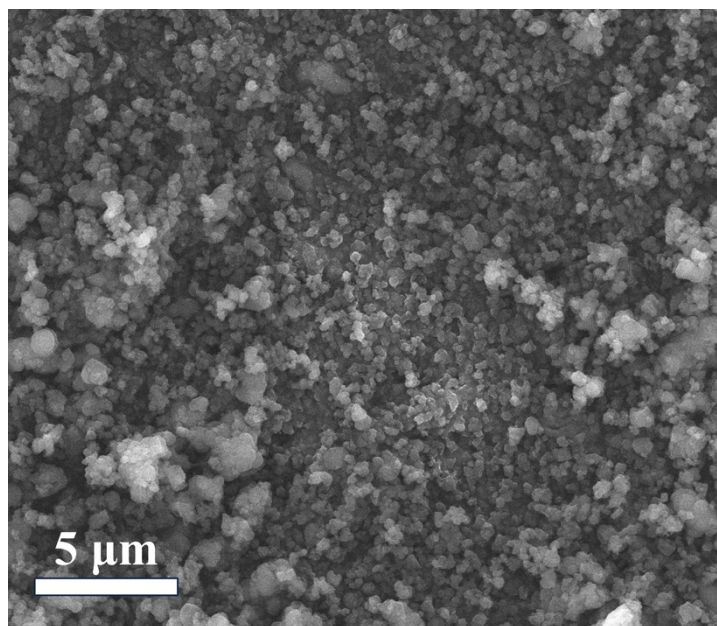

Fig. S1 SEM image of Ce-UiO-66-NH<sub>2</sub>.

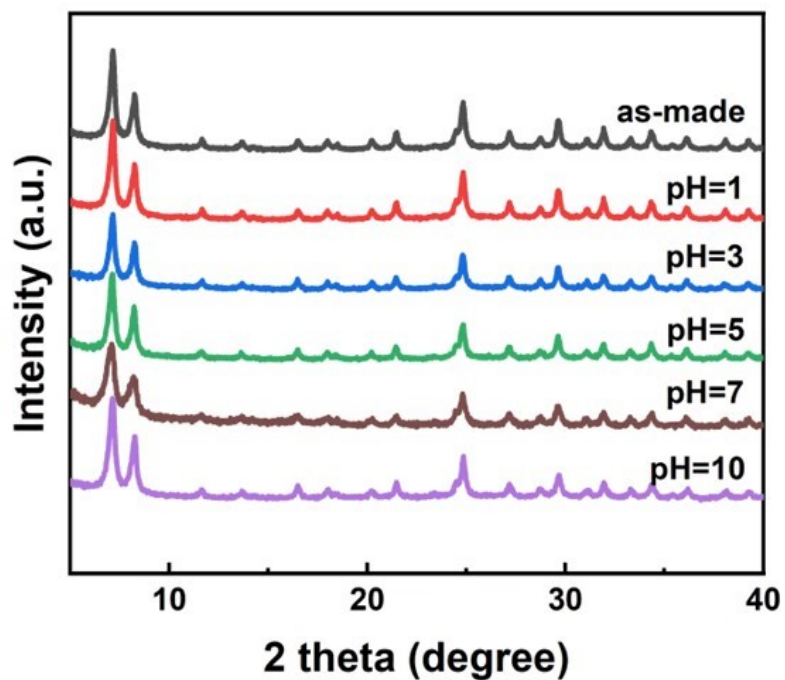

Fig. S2 PXRD patterns of Ce-Uio-66-NH<sub>2</sub> samples recovered from solutions at different pH values.

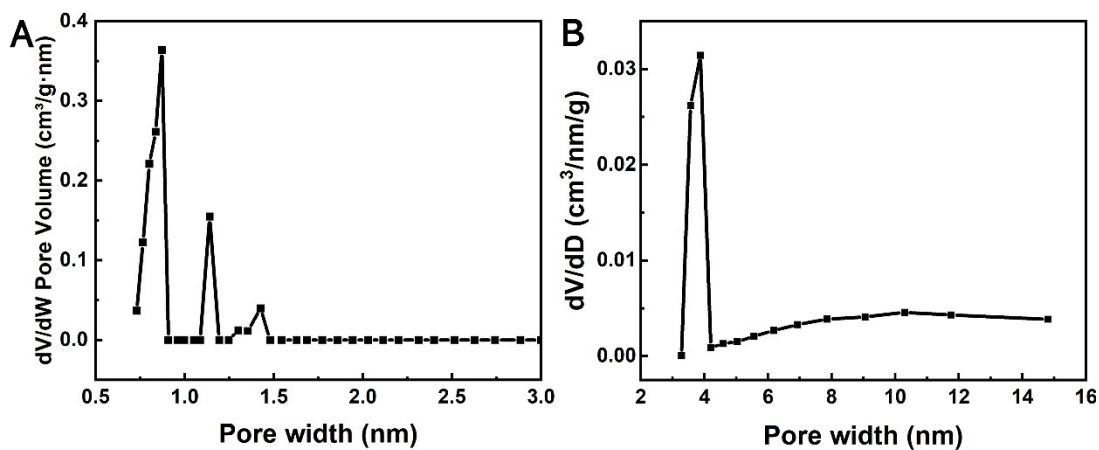

Fig. S3 (A) Density Functional Theory (DFT) pore diameter distributions and (B) Barrett-Joyner-Halenda (BJH) pore size distributions of Ce-Uio-66-NH<sub>2</sub>

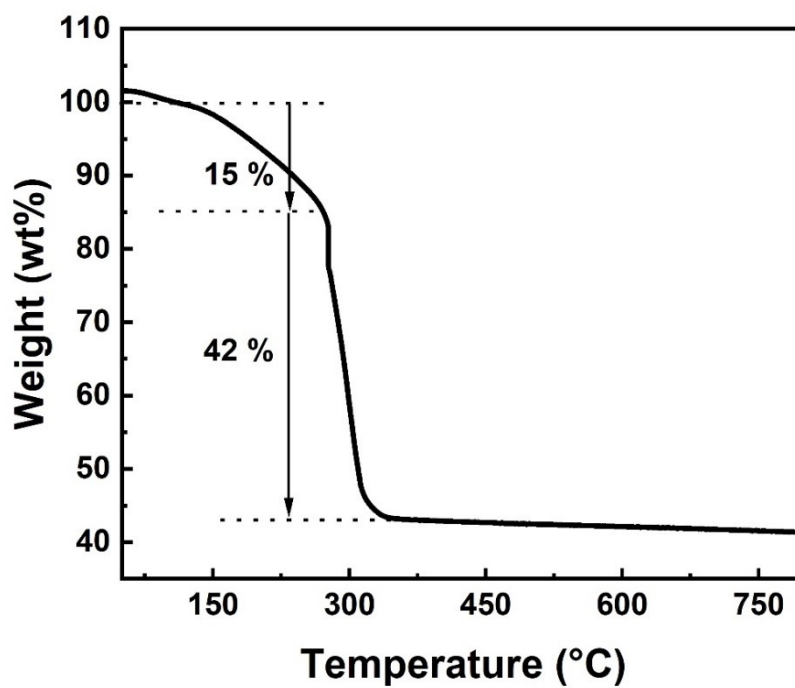

Fig. S4 TGA curve of as-made Ce-UiO-66-NH<sub>2</sub>.

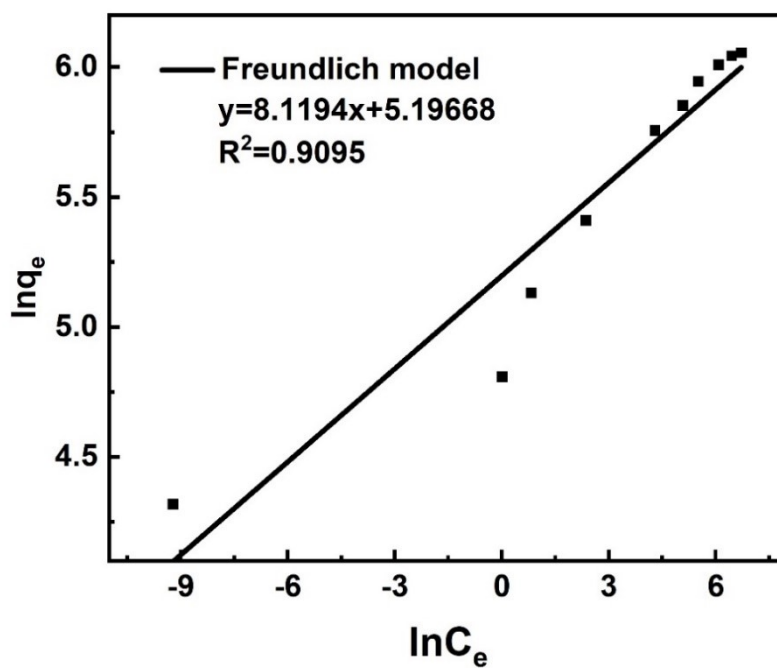

Fig. S5 the corresponding fitting curve of Freundlich model.

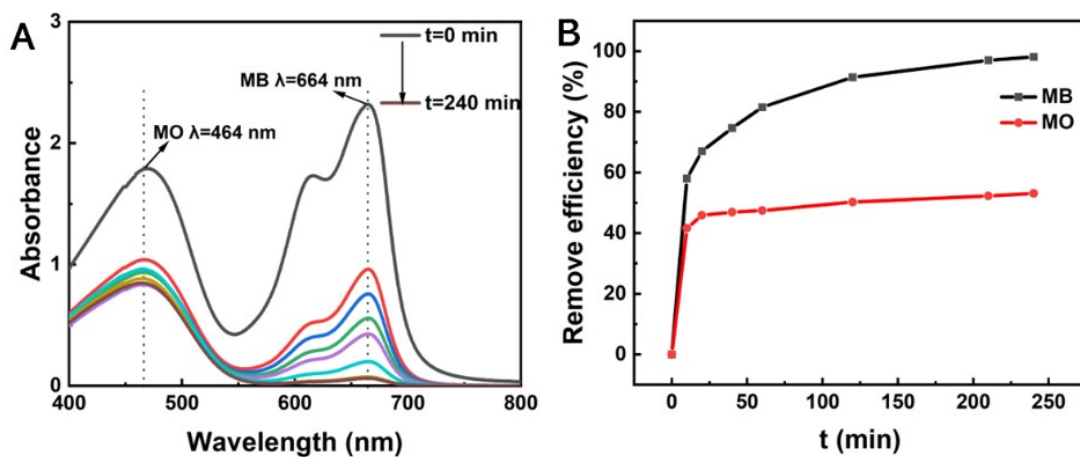

Fig. S6 (A) UV-Vis Spectra of adsorption for MB and MO dyes and (B) the corresponding adsorption plots.

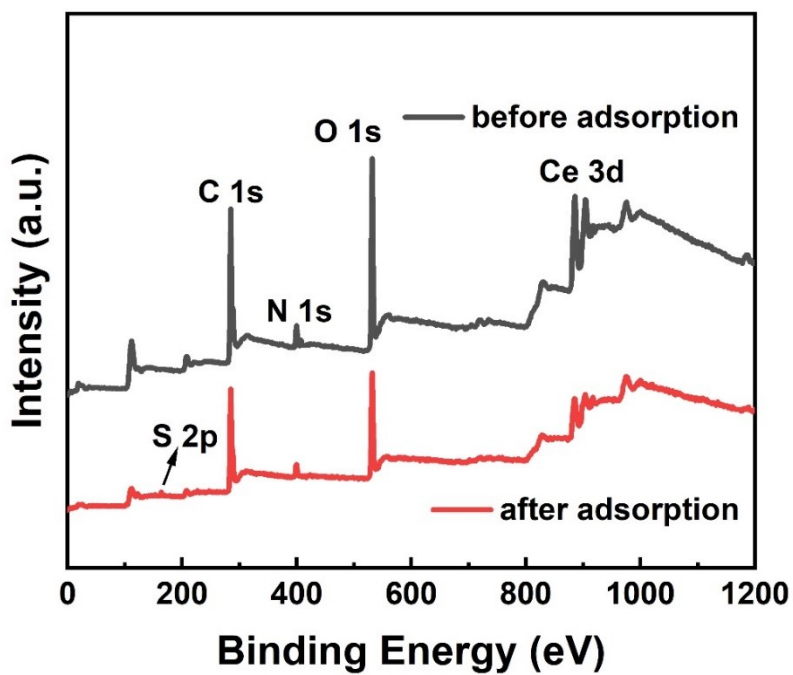

Fig. S7 Full XPS spectra of Ce-UiO-66-NH<sub>2</sub> before and after adsorption for MB.

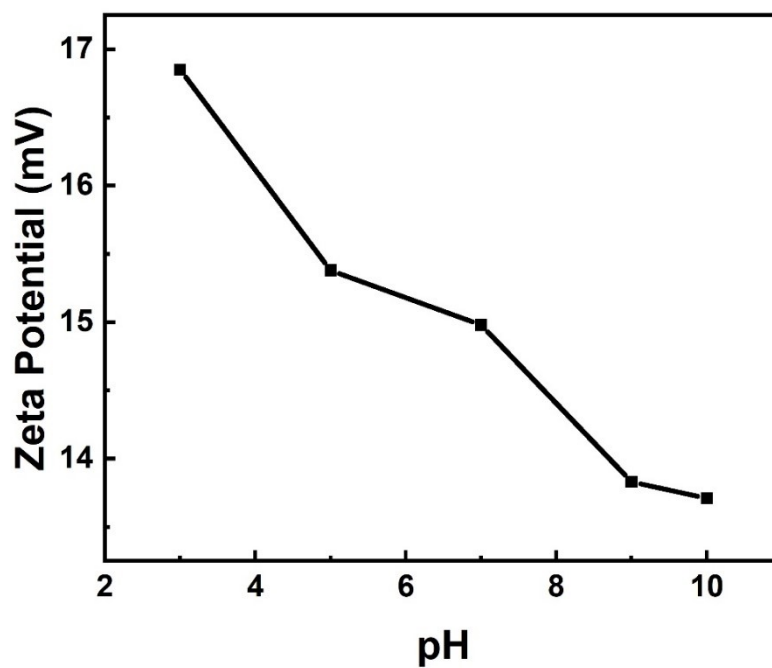

Fig. S8 Zeta potentials of Ce-UiO-66-NH<sub>2</sub> at varied pH values.

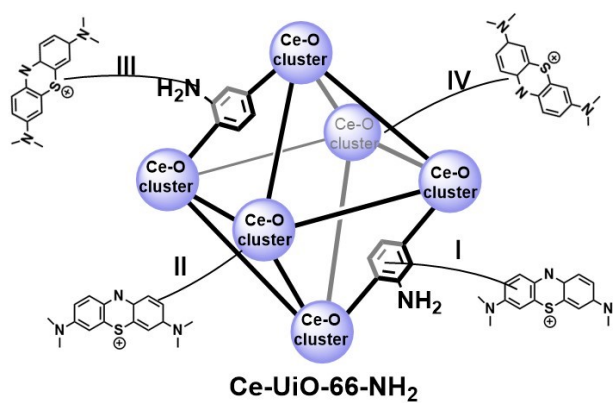

- I:  $\pi$ - $\pi$  stacking
- II: interactions between the central metal and the organic dyes
- III: intermolecular hydrogen bonding
- IV: pore filling

Fig. S9 Mechanism of MB adsorption on Ce-UiO-66-NH<sub>2</sub>.

Table S1 Comparison on the adsorption capacity of MB by UiO-66(Zr/Ce) based materials.

| Adsorbents                                                              | Maximum adsorption capacity of MB (mg·g <sup>-1</sup> ) | Ref.      |
|-------------------------------------------------------------------------|---------------------------------------------------------|-----------|
| Fe <sub>3</sub> O <sub>4</sub> @UiO-66                                  | 205                                                     | 1         |
| Fe <sub>3</sub> O <sub>4</sub> @UiO-66-SO <sub>3</sub> H                | 297.3                                                   | 2         |
| UiO-66-NH <sub>2</sub>                                                  | 96.45                                                   | 3         |
| Zr-UiO-66@Cu-HKUST-1                                                    | 208                                                     | 4         |
| ZIF-8-loaded UiO-66-NH <sub>2</sub>                                     | 173.01                                                  | 5         |
| Ce-MOF@Fe <sub>3</sub> O <sub>4</sub> @AC                               | 84.9                                                    | 6         |
| Ce(III) doped UiO-66                                                    | 145.3                                                   | 7         |
| UiO-66(Ce)                                                              | 243                                                     | 8         |
| UiO-66(Ce)                                                              | 110                                                     | 9         |
| Ce-UiO-66 electrospun cross-linked polyvinyl alcohol /chitosan nanofibe | 34.23                                                   | 10        |
| Ce-UiO-66-NH <sub>2</sub>                                               | 427                                                     | this work |

Table S2 Parameters of thermodynamic study for MB adsorption on Ce-UiO-66-NH<sub>2</sub>

| T(K) | lnK <sub>c</sub> | ΔG<br>(kJ·mol <sup>-1</sup> ) | ΔH<br>(kJ·mol <sup>-1</sup> ) | ΔS<br>(J·mol <sup>-1</sup> ·K <sup>-1</sup> ) |
|------|------------------|-------------------------------|-------------------------------|-----------------------------------------------|
| 303  | 3.32746          | -8.38242                      |                               |                                               |
| 313  | 5.30757          | -13.8118                      |                               |                                               |
| 323  | 8.00199          | -21.4487                      | 202.12                        | 764                                           |
| 333  | 11.44836         | -31.6955                      |                               |                                               |

## References

1. S. Ahmadipouya, M. Heidarian Haris, F. Ahmadijokani, A. Jarahiyan, H. Molavi, F. Matloubi Moghaddam, M. Rezakazemi and M. Arjmand, *Journal of Molecular Liquids*, 2021, **322**, 114910.
2. S. W. Lv, J. M. Liu, C. Y. Li, H. Ma, Z. H. Wang, N. Zhao and S. Wang, *New Journal of Chemistry*, 2019, **43**, 7770-7777.
3. Q. Chen, Q. He, M. Lv, Y. Xu, H. Yang, X. Liu and F. Wei, *Applied Surface Science*, 2015, **327**, 77-85.
4. M. R. Azhar, H. R. Abid, H. Q. Sun, V. Periasamy, M. O. Tade and S. B. Wang, *Journal of Colloid and Interface Science*, 2017, **490**, 685-694.
5. H. Zhang, X. Shi, J. Li, P. Kumar and B. Liu, *Nanomaterials (Basel)*, 2019, **9**, 1283.
6. R. Paz, H. Viltres, N. K. Gupta and C. Leyva, *Journal of Molecular Liquids*, 2021, **337**, 116578.
7. J. M. Yang, R. J. Ying, C. X. Han, Q. T. Hu, H. M. Xu, J. H. Li, Q. Wang and W. Zhang, *Dalton Trans*, 2018, **47**, 3913-3920.
8. D. Zhao and C. Cai, *Dyes and Pigments*, 2021, **185**, 108957.
9. R. M. Rego, G. Sriram, K. V. Ajeya, H. Y. Jung, M. D. Kurkuri and M. Kigga, *J Hazard Mater*, 2021, **416**, 125941.
10. A. Tati, S. Ahmadipouya, H. Molavi, S. A. Mousavi and M. Rezakazemi, *Ecotoxicology and Environmental Safety*, 2023, **266**, 115584.
